# 1 Integrating dynamical modeling and phylogeographic 2 inference to characterize global influenza circulation

3 Francesco Parino<sup>a,1</sup>, Emanuele Gustani-Buss<sup>b,1</sup>, Trevor Bedford<sup>c,d</sup>, Marc A. Suchard<sup>e,f</sup>,  
4 Nídia Sequeira Trovão<sup>g</sup>, Andrew Rambaut<sup>h</sup>, Vittoria Colizza<sup>a,i,2</sup>, Chiara Poletto<sup>j,2,3</sup>, and  
5 Philippe Lemey<sup>b,2,3</sup>

6 <sup>a</sup> Sorbonne Université, INSERM, Institut Pierre Louis d'Epidemiologie et de Santé Publique (IPLESP), Paris,  
7 France

8 <sup>b</sup> Department of Microbiology, Immunology and Transplantation, Rega Institute, KU Leuven – University of  
9 Leuven, 3000 Leuven, Belgium

10 <sup>c</sup> Vaccine and Infectious Disease Division, Fred Hutchinson Cancer Center, Seattle, Washington 98109, USA

11 <sup>d</sup> Howard Hughes Medical Institute, Seattle, Washington 98109, USA

12 <sup>e</sup> Departments of Biomathematics and Human Genetics, David Geffen School of Medicine at UCLA, University  
13 of California, Los Angeles, CA, 90095, USA

14 <sup>f</sup> Department of Biostatistics, UCLA Fielding School of Public Health, University of California, Los Angeles,  
15 CA, 90095, USA

16 <sup>g</sup> Fogarty International Center, National Institutes of Health, Bethesda, MD, USA

17 <sup>h</sup> Institute of Ecology and Evolution, University of Edinburgh, Edinburgh EH9 3FL, UK.

18 <sup>i</sup> Department of Biology, Georgetown University, Washington, DC, USA.

19 <sup>j</sup> Department of Molecular Medicine, University of Padova, 35121 Padova, Italy

20 <sup>1</sup>F.P. and E.G.-B. contributed equally to this work.

21 <sup>2</sup>V.C., C.P. and P.L. contributed equally to this work.

22 <sup>3</sup>To whom correspondence should be addressed: [philippe.lemey@kuleuven.be](mailto:philippe.lemey@kuleuven.be), [chiara.poletto@unipd.it](mailto:chiara.poletto@unipd.it)

**NOTE: This preprint reports new research that has not been certified by peer review and should not be used to guide clinical practice.**

## Abstract

Global seasonal influenza circulation involves a complex interplay between local (seasonality, demography, host immunity) and global factors (international mobility) shaping recurrent epidemic patterns. No studies so far have reconciled the two spatial levels, evaluating the coupling between national epidemics, considering heterogeneous coverage of epidemiological and virological data, integrating different data sources. We propose a novel combined approach based on a dynamical model of global influenza spread (GLEAM), integrating high-resolution demographic and mobility data, and a generalized linear model of phylogeographic diffusion that accounts for time-varying migration rates. Seasonal migration fluxes across global macro-regions simulated with GLEAM are tested as phylogeographic predictors to provide model validation and calibration based on genetic data. Seasonal fluxes obtained with a specific transmissibility peak time and recurrent travel outperformed the raw air-transportation predictor, previously considered as optimal indicator of global influenza migration. Influenza A subtypes supported autumn-winter reproductive number as high as 2.25 and an average immunity duration of 2 years. Similar dynamics were preferred by influenza B lineages, with a lower autumn-winter reproductive number. Comparing simulated epidemic profiles against FluNet data offered comparatively limited resolution power. The multiscale approach enables model selection yielding a novel computational framework for describing global influenza dynamics at different scales - local transmission and national epidemics vs. international coupling through mobility and imported cases. Our findings have important implications to improve preparedness against seasonal influenza epidemics. The approach can be generalized to other epidemic contexts, such as emerging disease outbreaks to improve the flexibility and predictive power of modeling.

**Keywords:** Influenza, Metapopulation, Phylogeography, Bayesian inference

## 1 Introduction

Seasonal influenza viruses cause recurrent epidemics characterized by annual periodicity in temperate countries and by diverse, less regular patterns in the tropics.<sup>1</sup> Extensive epidemiological research highlighted the critical role of local sociodemographic and environmental aspects (e.g. weather conditions, school calendar and increased indoor activity) in the onset and unfolding of influenza waves.<sup>2-10</sup> At the same time, international human travel ensures rapid worldwide circulation of influenza.<sup>11-13</sup> Phylogeographic studies have reconstructed the global migration patterns of seasonal influenza in extensive detail, revealing limited local persistence of the virus in most regions and highlighting the importance of continual reseeding in determining viral

56 genetic structure, severity and timing of the epidemics.<sup>12,14–16</sup> The concurrent impact of local  
57 and global drivers has also been apparent through analyses of the decline of influenza incidence  
58 observed during the coronavirus disease 2019 (COVID-19) pandemic. Both reduction in inter-  
59 national travel and social restrictions (due, e.g., to remote working and school closure) were,  
60 indeed, found to be associated to the influenza drop.<sup>17–19</sup> From a modeling perspective, how-  
61 ever, reconciling the two spatial levels represents a major challenge, as the interplay between  
62 the local progression of an epidemic in a particular country and the coupling between different  
63 epidemics mediated by human mobility remains poorly understood.

64 The unevenly distributed human host population across countries and seasonal areas and the  
65 complex network of human travel acting over both short and long range distances (i.e. from  
66 city-to-city commuting to international air travel) are key to this challenge.<sup>20,21</sup> In addition,  
67 while influenza surveillance is improving worldwide,<sup>18</sup> the coverage is still biased, restricting our  
68 ability to resolve the spatial dynamics. The quality of epidemiological data is generally higher  
69 in temperate areas, but these are the areas that are characterized by a high degree of synchro-  
70 nization of national influenza epidemics in the same hemisphere, thus making spatial effects less  
71 identifiable. As a consequence, mathematical models for influenza dynamics at different scales  
72 remain difficult to parametrize. Genetic data however carry the signature of large-scale circu-  
73 lation dynamics and may therefore represent a valuable complementary source to characterize  
74 seasonal influenza epidemics, especially when combined with epidemiological data. The recent  
75 severe acute respiratory syndrome coronavirus 2 (SARS-CoV-2) pandemic has illustrated the  
76 importance of combining epidemiological and mobility data, genomic sequences and metadata  
77 to provide insights into viral emergence and spread.<sup>22–27</sup> Phylogeographic inference in particu-  
78 lar has been widely applied to elucidate SARS-CoV-2 genomic epidemiology, including origins,  
79 introductions, routes of dispersal, and drivers associated with variant dissemination, contribut-  
80 ing to the effectiveness of systematic genomic surveillance.<sup>24–27</sup> However, the development of  
81 integrated tools is still relatively limited and opportunities remain to fulfill the full potential  
82 of phylodynamic approaches. Different from previous phylogeographic reconstructions, we here  
83 propose a novel approach that combines a high-resolution dynamical model for the diffusion of  
84 influenza worldwide, informed by extensive demographic and mobility data, and a generalized  
85 linear model of phylogeographic diffusion that allows for inhomogeneous migration rates over  
86 time. We use the epidemic model to simulate migration fluxes across macro regions of the world  
87 and evaluate their ability to explain phylogeographic patterns.

## 88 2 Results and Discussion

### 89 2.1 Combining mechanistic epidemic modeling and phylogeographic infer- 90 ence

91 We combine dynamical modeling and phylogeographic inference by considering the simulated  
92 fluxes of infectious cases generated by a data-driven computational model for infectious disease  
93 spread at the global scale as predictors for phylogeographic migration rates. For this purpose, we  
94 build on GLEAM, the GLocal Epidemic and Mobility model,<sup>28</sup> that integrates high-resolution  
95 demographic and mobility data at different spatial scales - air traffic database comprising nearly  
96 all commercial air-travels and short-range mobility obtained from national commuting data.<sup>28</sup>  
97 The global population is distributed among 3362 patches corresponding to large urban areas and  
98 traveling of individuals is modeled explicitly based on passenger data. GLEAM has been used  
99 to model the short-term outbreak dynamics in the case of the H1N1 influenza pandemic,<sup>11,13</sup>  
100 Ebola,<sup>29,30</sup> MERS,<sup>31,32</sup> Zika,<sup>33</sup> and COVID-19,<sup>34-37</sup> following prior modeling work considering  
101 the global scale.<sup>38-40</sup>

102 To adapt GLEAM to seasonal circulation of influenza, we introduce a more realistic scheme  
103 for modeling mobility of individuals that preserves their geographic residence (see Material and  
104 Methods for more details). This approach is usually adopted for modeling recurrent travel,  
105 such as commuting,<sup>28,41,42</sup> while a simpler Markovian mobility model assuming memory-less  
106 traveling trajectories is generally preferred for air travel. Although less realistic, the latter is  
107 more parsimonious and has only a limited approximation bias for fast spreading diseases and  
108 short-term epidemic dynamics.<sup>42</sup> In our analysis of the multi-annual influenza propagation, we  
109 compare both the Markovian and the recurrent travel approach.

110 In the metapopulation scheme, GLEAM transmission dynamics occur within patches ruled by  
111 a compartmental model specific to seasonal influenza<sup>2,3,11,43,44</sup> (Material and Methods) and ac-  
112 counting for: (i) a temporary immunity to the virus of average duration  $D$ , with values explored  
113 between 1 and 8 years; (ii) a geographically dependent seasonal transmission in temperate areas  
114 varying sinusoidally in time between a minimum and a maximum basic reproductive number,  
115  $R_{\min}$  (explored values: 0.5 and 0.75) and  $R_{\max} \in [1.25, 2.5]$ , respectively, with 15 Nov, 15 Dec,  
116 and 15 Jan tested as dates of maximum transmission in the northern hemisphere and minimum  
117 transmission in the southern hemisphere; (iii) a constant transmission with a basic reproductive

118 number equal to  $R_{\max}$  in the tropics. Discrete stochastic simulations at the individual level  
119 provide numerical trajectories for the global seasonal dynamics with a time resolution of one  
120 day. Results display autumn-winter waves interspersed by subcritical spring-summer transmis-  
121 sion in the temperate hemispheres, and an irregular continuous circulation in the tropics. The  
122 output is summarized as fluxes during the spring-summer and autumn-winter epochs between  
123 the countries considered by the phylogeographic approach.

124 To evaluate different parameterisations of our dynamical model, we test the resulting fluxes in a  
125 phylogeographic approach. To this purpose, we adopt a generalized linear model (GLM) exten-  
126 sion of discrete phylogeographic diffusion<sup>12</sup> that accommodates time-inhomogeneous migration  
127 dynamics. The GLM-diffusion approach allows modeling the intensity of location exchange  
128 between discrete states along a phylogeny as a function of a number of potential predictors.<sup>12</sup>  
129 Using epoch modeling,<sup>45</sup> we allow for different location exchange processes, and hence different  
130 predictors, across different time intervals in the evolutionary history. Specifically, we con-  
131 sider the difference in model-based fluxes during alternating spring-summer and autumn-winter  
132 epochs. We employ comprehensive sequence data sets that were previously analyzed to recon-  
133 struct more than a decade of global seasonal migration dynamics of influenza A H3N2, H1N1  
134 (prior to the H1N1/09 pandemic), B Victoria (VIC) and Yamagata (YAM) between 2000 and  
135 2012.<sup>16</sup> We model the phylogeographic process between the countries of sampling for these dif-  
136 ferent influenza subtypes. We use BEAST<sup>46</sup> to estimate parameters of the time-inhomogeneous  
137 GLM-diffusion approach through Bayesian inference while averaging over a set of time-measured  
138 trees.

## 139 **2.2 Model selection and parameter estimation**

140 We evaluated different sets of migration fluxes, including simple passenger fluxes based on air  
141 travel data, simulated migration fluxes from the Markovian and the recurrent travel version of  
142 GLEAM, either as homogeneously aggregated fluxes over time (annual fluxes) or as two-epoch  
143 level fluxes (seasonal fluxes).

144 To avoid including an excessive amount of migration flux predictors in a single GLM diffusion  
145 model analysis, our systematic evaluation relied on a stepwise approach. We first tested Marko-  
146 vian against recurrent travel fluxes for different epidemiological parameters ( $R_{\min}$ ,  $R_{\max}$  and  
147  $D$ ) while conditioning on seasonal fluxes with a peak time in January in the northern hemi-

148 sphere. Next, we tested seasonal against annual fluxes conditioning on recurrent travel fluxes  
149 and a peak time in January. Finally, we tested the January peak time against peak times in  
150 December and November conditioning on seasonally aggregated recurrent travel fluxes. In each  
151 of these analyses, we include simple air passenger fluxes as a baseline predictor, and we per-  
152 form the analysis with and without a predictor based on the residuals of a regression of sample  
153 sizes against population sizes to assess the potential impact of sample sizes. Fig. 1 summa-  
154 rizes the marginal posterior inclusion probabilities for the different comparisons, while inclusion  
155 probabilities for individual flux predictors are provided in Supplementary Tables 3-6.

156 Our analyses support GLEAM fluxes based on recurrent travel for H3N2, H1N1 and YAM,  
157 demonstrating i) an improvement of dynamical model predictions over simple air travel for  
158 most of the influenza variants and ii) the importance of accounting for memory in the origin  
159 of travel trajectories of individuals. For these three variants, seasonally aggregated fluxes also  
160 outperformed annual fluxes and a peak time in January outperformed earlier peak times (with  
161 an inclusion probability of  $\sim 1$ ). For H3N2 specifically, seasonal fluxes strongly outperformed  
162 annual fluxes with and without residual predictor (inclusion probability of  $\sim 1$ ) (Supplementary  
163 Table 4) and a similar support was detected for H1N1 (inclusion probability of  $\sim 0.95$ ). The in-  
164 clusion probability for YAM was marginally lower when employing the residual predictor (0.72).  
165 When comparing the magnitude of best-supported predictors, the support for seasonal fluxes  
166 was approximately 20 times stronger than annual flux. In the case of VIC, GLEAM fluxes are  
167 only supported in the analysis without sample size residual. Standard phylogeographic analyses  
168 of these data sets have previously shown that VIC is associated with the highest degree of persis-  
169 tence and the lowest overall migration,<sup>16</sup> so offering less information to support GLEAM-based  
170 fluxes, in particular when sample heterogeneity can explain a considerable degree of migration  
171 variability. For the seasonal GLEAM fluxes based on recurrent travel and based on a Jan 15  
172 peak time, we next summarized the support for the different values of  $R_{\max}$ ,  $R_{\min}$  and  $D$   
173 (Fig. 2). For H3N2, the parameter combination including  $R_{\max} = 2.25$ ,  $R_{\min} = 0.75$  and  
174  $D = 2$  years yields the highest flux inclusion probability (inclusion probability  $\sim 1$  and 0.68 with  
175 and without sample size residual, respectively). The parameter values in this combination are  
176 also clearly the ones that are preferred across all combinations in analyses with and without  
177 residual predictor (Fig. 2). In Section 3 of the Supplementary Material, we investigate differ-  
178 ences in fluxes generated by different parametrizations and note that the GLM selects fluxes  
179 that are distinct from those generated by other parameterizations. The H1N1 analysis with

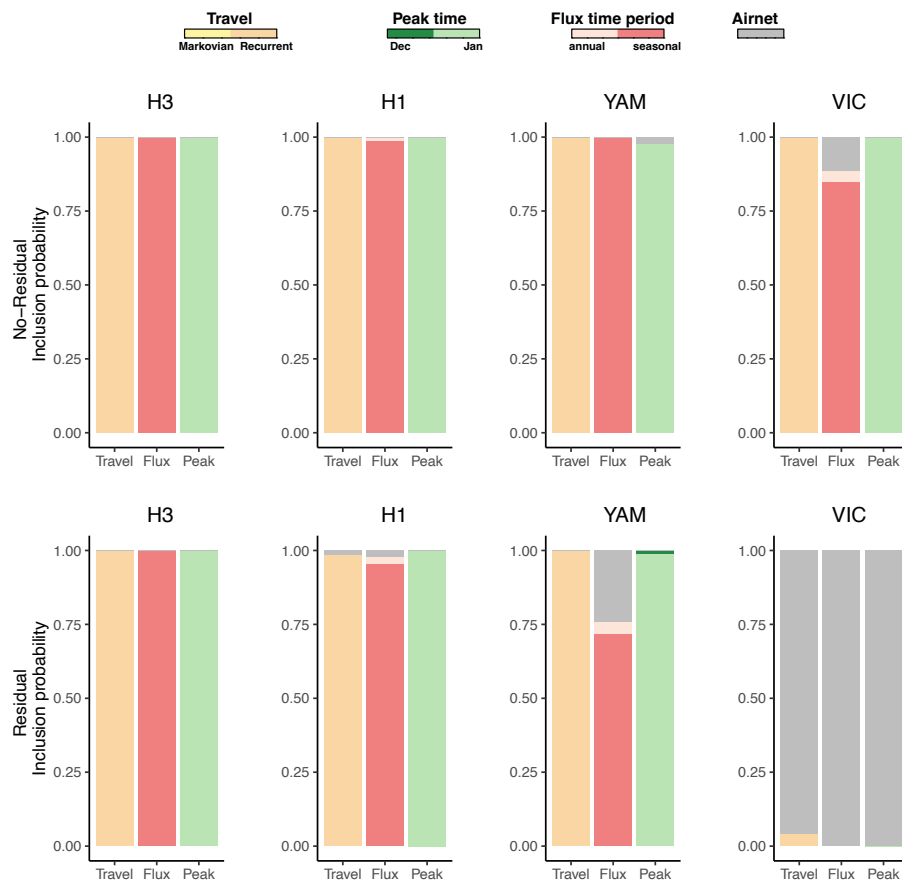

Figure 1: Marginal posterior inclusion probabilities associated with air travel data or with GLEAM-based fluxes comparing recurrent against Markovian travel, seasonal against annual fluxes and different peak time times. For peak times, we performed an analysis comparing Nov 15 against Dec 15 and an analysis comparing Dec 15 to Jan 15, but we only show the latter for simplicity as Dec 15 outperformed Nov 15.

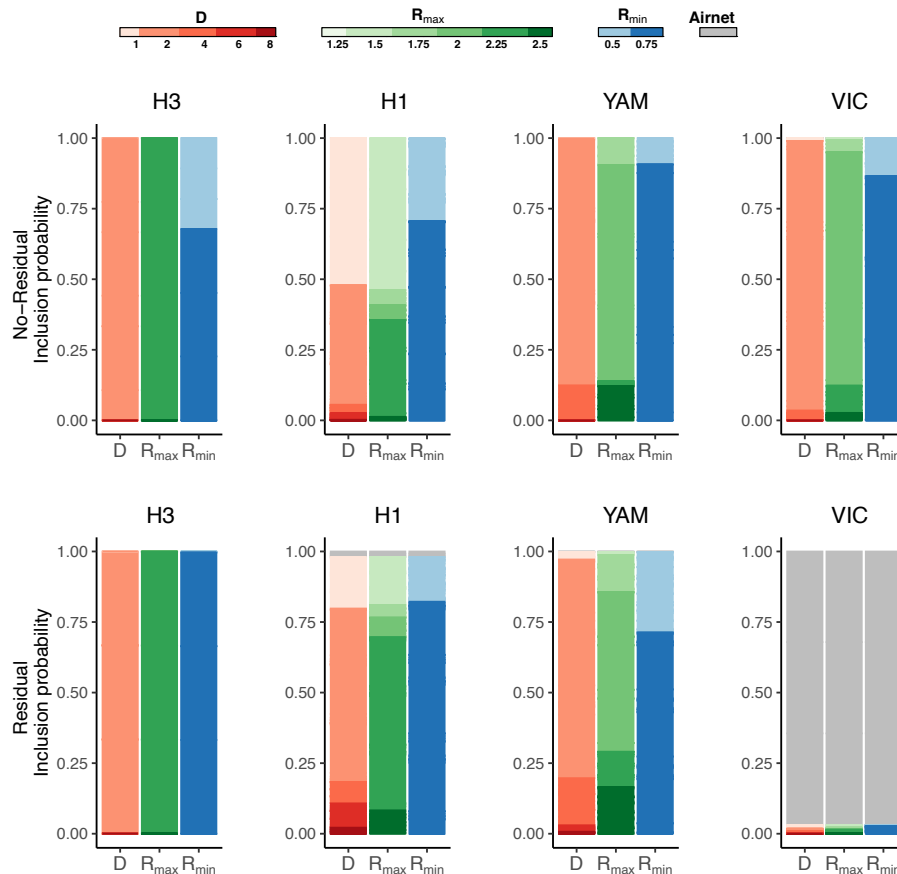

Figure 2: Marginal posterior inclusion probabilities associated with recurrent travel distribution of GLEAM fluxes for the three parameters  $R_{\max}$ ,  $R_{\min}$  and  $D$ , without and with residual predictor.

180 sample size residual also finds this parameter combination to be the best supported, but not  
 181 as strongly so (0.59 inclusion probability), while the analysis without sample size residual finds  
 182 marginally lower support (0.33 inclusion probability) compared to a parameter combination  
 183 including  $R_{\max} = 1.50$ ,  $R_{\min} = 0.75$  and  $D = 1$  years (0.52 inclusion probability).

184 The analysis of YAM without residual predictor recovers the same general preference for  $D$   
 185 and  $R_{\min}$  (2 years and 0.75, respectively), but finds the strongest support for a somewhat  
 186 lower  $R_{\max}$  of 2.00 (0.77 inclusion probability). The same parameterization is supported by  
 187 the analysis with residual predictor, but with somewhat lower inclusion probability (0.56).  
 188 Without residual predictor, the analysis of VIC supports the same parameterization as YAM  
 189 (0.60 inclusion probability, Fig. 2).

190 The rapid immune waning we identify, with average duration of immune protection between 1  
 191 and 3 years, is in agreement with previous work,<sup>47–50</sup> but some studies have estimated longer



immunity duration.<sup>2,3</sup> Smaller transmissibility for influenza B compared to A/H3N2 (as estimated for both Yamagata and Victoria) is also consistent with previous works.<sup>16,48</sup> Those studies typically use incidence curves at the country level, whereas our selection is based on influenza migration patterns encoded in the genetic data. The spatial coupling, thus, carries the signature of country seasonal waves. For the period between two consecutive epidemics, early analyses of genetic data in temperate areas suggested that inter-seasonal circulation of influenza was dominated by the importation of cases from other seasonal areas, with negligible local transmission following importation.<sup>51–53</sup> Recent improvements in out-of-season surveillance are providing increasing evidence for the sporadic generation of cases during the spring-summer period,<sup>54–56</sup> in agreement with spring-summer transmissibility of  $R_{\min} = 0.75$  supported by our analyses.

### 2.3 Predicted influenza dynamics

We compare country-level epidemics simulated by GLEAM with recurrent travel and epidemic profiles reconstructed from FluNet data to evaluate model predictions against available surveillance data. The number of influenza-positive samples stored for each subtype in FluNet has been extensively used for reconstructing the timing and shape of the epidemic peaks.<sup>1,8,17,47,57</sup> We compute monthly distributions of cases averaged over the period 2004/05–2014/15 as an indicator of the typical influenza behavior of the country (see Supplementary Material for additional details). Fig. 3 compares the H3N2 epidemic profile with the simulated one for a set of countries in each seasonal area (see Supplementary Material for additional details). The timing and shape of the epidemic waves are well reproduced by the model in the majority of temperate area countries (average correlation  $0.83 \pm 0.03$  for the Northern hemisphere and  $0.66 \pm 0.10$  for the Southern hemisphere), representing also the region with the highest availability of country records. In the tropics, correlations are generally lower (average correlation  $0.10 \pm 0.05$ ) because of the rather noisy and flat epidemic profiles. For large countries, strong spatial fragmentation of the population and climatic heterogeneity complicates analyses at the national scale,<sup>58</sup> as illustrated for China. These results were obtained with the best parameterization for H3N2 as selected by the phylogeographic GLM. Other parameter sets performed worse, but a number of different simulated scenarios also showed a similarly high correlation with the data (see Supplementary Material for details and analysis of other influenza subtypes). These results indicate that the degree of information carried by incidence data is limited, likely due to the high level

A / H3N2

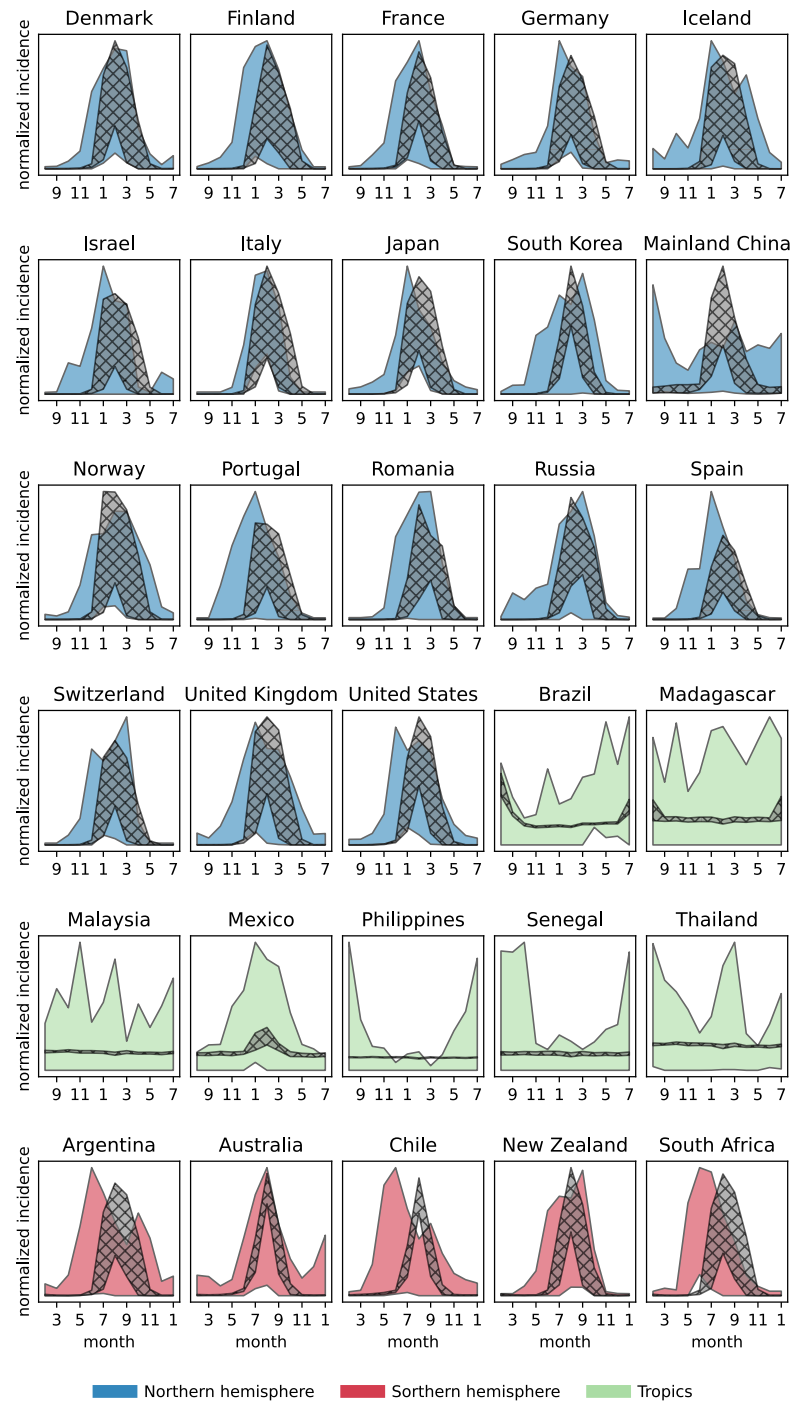

Figure 3: Annual epidemic profiles for 30 selected countries from FluNet H3N2 samples (colored) and simulations with the best-supported scenario (gray). For each seasonal region, selected countries are representative of the whole set for average correlation and its dispersion. Shaded areas show the 95% CI of the normalized incidence (see Supplementary Material).

223 of synchronization between country waves, together with non-uniform surveillance coverage and  
 224 quality (see Supplementary Fig. 5). This suggests that the best parametrization could be se-

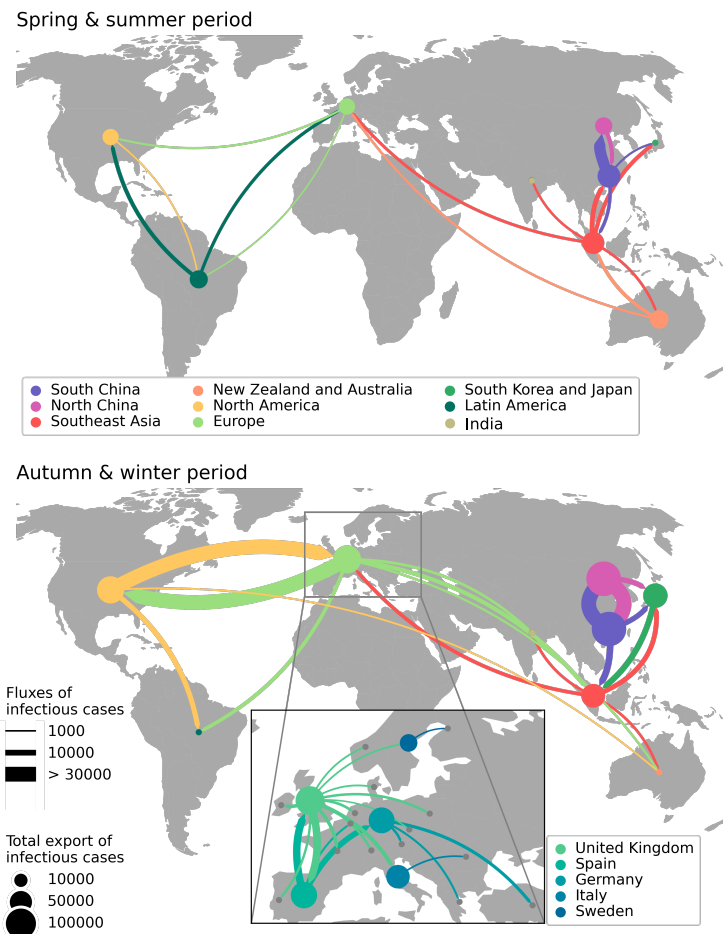

Figure 4: Dominant fluxes of cases for the two epochs. To enhance clarity, countries have been grouped into geographic areas. We have considered here the same region repartition as in.<sup>16</sup> The plots show the top 10 areas in terms of importations, along with the fluxes responsible for 60% of the importations. In the case of Europe, we show the top 20 countries, each featuring only the most significant importation flux. Fluxes between countries/areas are color-coded according to their country/area of origin.

225 lected as the one that has high correlation with incidence and at the same time explains the  
 226 genetic data well, i.e. has high inclusion probability in the GLM analysis.

227 Simulated influenza circulation shows a strong coupling between Europe and North America  
 228 during autumn-winter, together with the central role of Southeast Asia and China as influenza  
 229 sources for the Asian continent and Oceania during spring-summer and autumn-winter periods.  
 230 In particular, Southeast Asia is one of the main sources of importation for Australia, Japan  
 231 and Korea, India and Europe. South America appears to be disconnected from Asian regions  
 232 (see Fig. 4 and Supplementary Table 8 and 9), but plays a role as seeder of influenza in North  
 233 America and Europe during spring-summer epochs.

234 The pattern shown here is largely consistent with the results of previous phylogeographic recon-

235 structions .<sup>12,14–16</sup> We looked more in depth to importation fluxes across European countries  
236 and found a West to East migration pattern compatible with the West-to-East gradient in peak  
237 timing observed in the region.<sup>57,59</sup> This highlights that human population distribution, human  
238 mobility and seasonal variation in transmission are important drivers of influenza circulation at  
239 the global and continental levels.

240 The multiscale nature of influenza dynamics generated by GLEAM with recurrent travel allows  
241 simultaneously reconstructing within country spread and global virus circulation, shedding light  
242 on the dynamical coupling among countries underlying seasonal epidemic waves. In Fig. 5 we  
243 compare local transmission with case importations according to the region of origin. The contri-  
244 bution of importations to local epidemics is important during out-of-season periods as a seeding  
245 component that can generate long transmission chains at the beginning of the influenza season.  
246 Model predictions on the geographical origin of importations may therefore carry important  
247 epidemiological information about the approaching season. Fig. 5 highlights the differences in  
248 the behavior between specific countries. A high level of geographical mixing is observed for  
249 Australia where importations during summer and at the beginning of the influenza season origi-  
250 inate from Southeast Asia, Europe and North America. For Japan and the United States on  
251 the other hand, a geographical pattern emerges in which the large majority of importations  
252 originate from a specific region, i.e. Southeast Asia for Japan and South America for United  
253 States.

## 254 **2.4 Limitations**

255 Our model captures global circulation patterns that largely explain both incidence and genetic  
256 data, with selected parameterizations that are generally consistent for both H3N2, H1N1 and  
257 YAM. While phylogeographic analysis showed that migration rates were substantially corre-  
258 lated for H3N2, H1N1, and YAM, these lineages were also characterized by different degrees  
259 of persistence in specific locations.<sup>16</sup> A uniform model of seasonality in the region overlooks  
260 environmental and human forcing that are acting at the country and sub-country level and that  
261 are known to shape the epidemic dynamics in the region.<sup>7,8,57,60</sup> In addition, strain-specific  
262 antigenic evolution and its interplay with demography and age structure can affect migration  
263 patterns, which is not accounted for in our model. For instance, H1N1 hits more severely the  
264 younger population that mix more at the local geographical scale but travel less frequently over  
265 long-range distances compared to the adult population.<sup>16</sup> This effect has been shown to impact

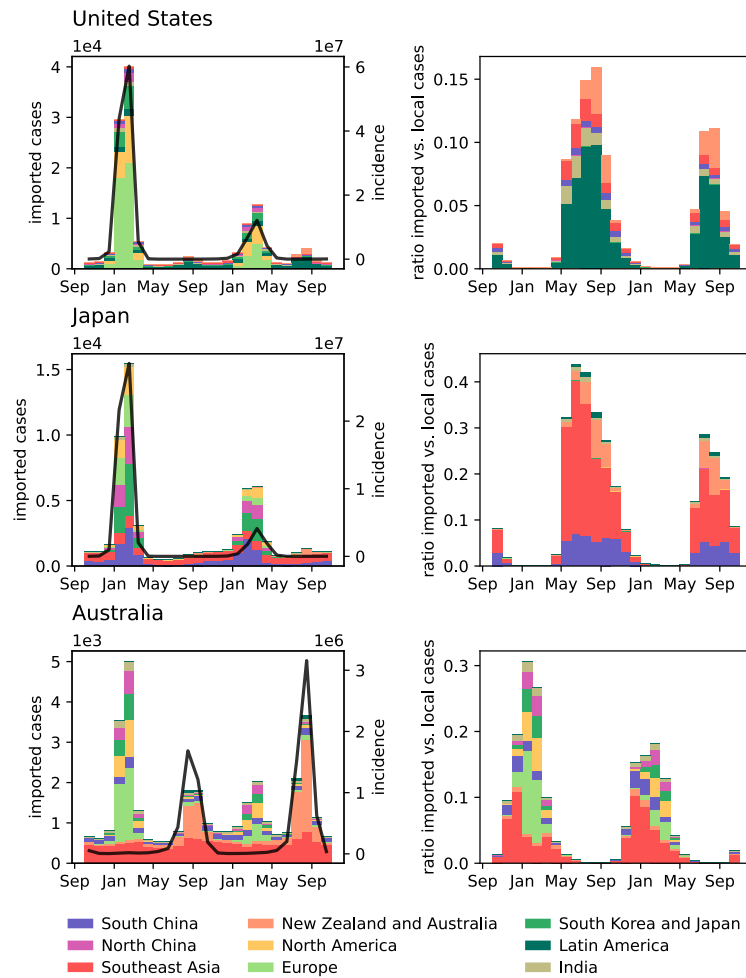

Figure 5: Left: simulated incidence (black line, right axis) and number of imported cases (bars, left axis) for two consecutive years from a single stochastic realization - for the best parametrization obtained for H3N2. Right: ratio of imported vs. local cases. Bars are assigned colors based on their respective area of origin (same repartition as in Fig. 4). The bars with grey/white stripes combine values for regions outside the top six from which the selected country imports cases.

266 the spatial invasion and the local persistence of an infection.<sup>16,61</sup> Differences in strain-specific  
 267 patterns may arise also from complex interactions between subtypes that are difficult to capture  
 268 from a general seasonal model. Further fine-tuning of simulation parameters may also assist in  
 269 better capturing subtle differences in the strain specific dynamics.

## 270 **3 Conclusions**

271 By designing a combined approach, we were able to employ genetic data to validate and calibrate  
272 a dynamical model for the multiscale spread of influenza. The model simulates within-country  
273 epidemics, spatial coupling mediated by human mobility, and thus the resulting global circu-  
274 lation of the virus. The information encoded in the genetic data allowed for unambiguous  
275 identification of the essential epidemiological parameters, whereas incidence data offered only  
276 low resolution power. We were able to show that population distribution, local mobility and  
277 international travel, as well as seasonality are fundamental ingredients to accurately model  
278 influenza migration patterns.

279 We have here studied a decade of influenza dynamics before the COVID-19 pandemic. Fol-  
280 lowing SARS-CoV-2 emergence in 2020, the global influenza circulation has been substantially  
281 altered with potential long-term consequences,<sup>62</sup> as illustrated by the probable extinction of  
282 the B Yamagata variant.<sup>63</sup> In such a situation, the long-term and global-scale description of  
283 influenza dynamics is more than ever important to identify viral evolutionary pathways for the  
284 prediction of vaccine composition, to inform projections on the approaching influenza season in  
285 a given region, and, on a more fundamental level, to disentangle the interplay between endoge-  
286 nous and exogenous factors in shaping regional epidemic waves. Phylodynamic approaches may  
287 become an invaluable tool to achieve these goals. Our study provides the starting point of a new  
288 methodological approach that can be further extended with additional ingredients and data lay-  
289 ers to improve the description of the source-sink dynamics and strain-specific features and their  
290 interactions in the post-COVID-19 pandemic era. Advances in global influenza surveillance,<sup>18,60</sup>  
291 along with the increased availability of large-scale data-sets<sup>8</sup> will undoubtedly instigate further  
292 model developments. In addition, the flexible multi-step structure of our approach makes it  
293 adaptable to a variety of epidemic models, infectious diseases, and epidemic scenarios.

## 294 **4 Material and Methods**

### 295 **4.1 GLEAM**

296 The GLEAM mobility layer integrates the global flight network with the daily commuting pat-  
297 terns between adjacent patches<sup>64</sup> (see Supplementary Material). The short-range commuting is  
298 accounted for by defining effective patch mixing, based on a time-scale separation approach.<sup>11,28</sup>

299 Air travel mobility is modeled explicitly, as a discrete-time multinomial process.<sup>65</sup> In Markovian  
300 GLEAM, the daily probability that an individual travels from patch  $i$  to patch  $j$  is  $p_{ij} = w_{ij}/N_i$ ,  
301 with  $N_i$  being the population size of  $i$  and  $w_{ij}$  being the flux of passengers from  $i$  to  $j$  in the  
302 air transportation data. Traveling probability does not account for the location of residence of  
303 individuals. In the recurrent travel GLEAM, the flux of travelers  $w_{ij}$  is subdivided into individ-  
304 uals resident in  $i$  and departing for  $j$ , and individuals visiting  $i$  and returning to the residence  
305 location  $j$ .<sup>41,66–68</sup> Leaving and returning home are modeled as distinct processes with average  
306 trip duration assumed to be 15 days<sup>28</sup> and departing rate derived from  $w_{ij}$  (see Supplementary  
307 Material). Influenza transmission dynamics is modeled within each patch through a compart-  
308 mental model where individuals are divided in susceptible, latent, symptomatic infectious (that  
309 may or may not travel dependent on the severity of symptoms), asymptomatic infectious and  
310 recovered, i.e. immune to the virus. The average duration of the exposed and infection pe-  
311 riod are set to 1.1 and 2.5 days, respectively.<sup>11</sup> Given the stochastic nature of the model, each  
312 parametrization generates a collection of possible time evolutions for the observables, such as  
313 prevalence, peak of infection, number of imported cases, etc., at the spatial resolution of a sin-  
314 gle patch and time resolution of a day, that can be aggregated at the desired level in time and  
315 space.

## 316 **Phylogeographic analysis**

317 We combine a generalized linear model (GLM) parameterization of discrete phylogeographic  
318 diffusion<sup>12</sup> with epoch modelling<sup>45</sup> in a Bayesian full probabilistic framework. Both approaches  
319 represent extensions of continuous-time Markov chain (CTMC) processes implemented in a  
320 Bayesian phylogenetic framework.<sup>69</sup> The GLM diffusion model parameterises the CTMC tran-  
321 sition rates as a log linear function of a number of potential predictors and allows estimating  
322 both the size of the contribution and the inclusion probability of each predictor. Previous  
323 applications have demonstrated how this model averaging approach can identify the predictor  
324 or set of predictors that adequately explain the dynamics among location<sup>12,70</sup> or among host  
325 transitioning.<sup>71</sup> Here, we adapt this approach to compare the fit of individual model-based  
326 fluxes as predictors of phylogeographic diffusion. In order to model heterogeneity in migration  
327 rates through time, and hence to allow for different fluxes predicting these time-variable rates,  
328 we adopt an epoch modeling approach.<sup>45</sup> The epoch approach partitions evolutionary history  
329 into an arbitrary number of time intervals or epochs, separated by transition times, and allows

330 specifying a potentially different CTMC parameterisation for each epoch. Here, we set up tran-  
331 sition times every six months separating each time spring-summer (here defined as the period  
332 from March 21 to September 20) from autumn-winter (from the September 21 to March 20).  
333 We apply two different alternating GLM parameterizations through time: one shared by every  
334 spring-summer epoch and one shared by every autumn-winter epoch. We perform inference  
335 under the GLM and epoch model using Markov chain Monte Carlo (MCMC) integration using  
336 BEAST.<sup>46</sup>

337 We fit both time-homogeneous and epoch GLM models with the flux predictors to influenza A  
338 lineages H3N2 and H1N1 and influenza B lineages Yamagata (YAM) and Victoria (VIC), pre-  
339 viously analysed by.<sup>16</sup> These data sets consist of haemagglutinin (HA) gene sequences covering  
340 a time interval from 2000 to 2012 and represent roughly equitable spatiotemporal distributions  
341 across global regions. The data sets comprise 4,006, 2,144, 1,455, and 1,999 sequences for H3N2,  
342 H1N1, YAM, and VIC, respectively. We fit our models to the same empirical tree distributions  
343 as used in the original work. We run sufficiently long MCMC chains to ensure adequate mixing  
344 as assessed by effective sample size estimates.

## 345 5 Funding

346 PL, VC, CP, ECGB and FP acknowledge funding from EU Horizon 2020 grants MOOD (H2020-  
347 874850, publication cataloged as MOOD 102). VC acknowledges support from Horizon Europe  
348 grant ESCAPE (101095619) and Agence Nationale de la Recherche projects DATAREDUX  
349 (ANR-19-CE46-0008-03). PL, MAS and AR acknowledge funding from the European Research  
350 Council under the European Union’s Horizon 2020 research and innovation programme (grant  
351 agreement no. 725422-ReservoirDOCS) and from the Wellcome Trust Collaborative Award,  
352 206298/Z/17/Z. MAS acknowledges support from US National Institutes of Health grants U19  
353 AI135995, R01 AI153044 and R01 AI162611. PL acknowledges support by the Special Research  
354 Fund, KU Leuven (‘Bijzonder Onderzoeksfonds’, KU Leuven, OT/14/115), and the Research  
355 Foundation – Flanders (‘Fonds voor Wetenschappelijk Onderzoek – Vlaanderen’, G066215N,  
356 G0D5117N and G0B9317N). CP acknowledges funding by the Cariparo Foundation through  
357 the program Starting Package and the Department of Molecular Medicine of the University of  
358 Padova through the program SID from BIRD funding. TB is a Howard Hughes Medical Institute  
359 Investigator and is supported by NIH NIGMS R35 GM119774. The opinions expressed in this



360 article are those of the authors and do not reflect the view of the National Institutes of Health,  
361 the Department of Health and Human Services, or the United States government.

## 362 **6 Author contributions statement**

363 T.B., V.C., C.P., P.L. designed research; F.P., E.G., T.B., V.C., C.P., P.L. performed research;  
364 F.P., E.G., T.B., M.A.S., N.S.T., A.R., V.C., C.P., P.L. analyzed data; F.P., E.G., T.B., M.A.S.,  
365 N.S.T., A.R., V.C., C.P., P.L. wrote the paper.

## 366 **7 Competing interests**

367 The authors declare no competing interests.

## 368 **References**

- 369 [1] Finkelman, B. S.; Viboud, C.; Koelle, K.; Ferrari, M. J.; Bharti, N.; Grenfell, B. T. *PLoS*  
370 *ONE* **2007**, *2*, e1296.
- 371 [2] Truscott, J.; Fraser, C.; Cauchemez, S.; Meeyai, A.; Hinsley, W.; Donnelly, C. A.; Ghani, A.;  
372 Ferguson, N. *Journal of The Royal Society Interface* **2012**, *9*, 304–312.
- 373 [3] Axelsen, J. B.; Yaari, R.; Grenfell, B. T.; Stone, L. *Proceedings of the National Academy*  
374 *of Sciences* **2014**, *111*, 9538–9542.
- 375 [4] Shaman, J.; Pitzer, V. E.; Viboud, C.; Grenfell, B. T.; Lipsitch, M. *PLoS biology* **2010**, *8*,  
376 e1000316.
- 377 [5] Charu, V.; Zeger, S.; Gog, J.; BjÅžrnstad, O. N.; Kissler, S.; Simonsen, L.; Grenfell, B. T.;  
378 Viboud, C. *PLOS Computational Biology* **2017**, *13*, e1005382.
- 379 [6] Tamerius, J. D.; Shaman, J.; Alonso, W. J.; Bloom-Feshbach, K.; Uejio, C. K.; Comrie, A.;  
380 Viboud, C. *PLoS pathogens* **2013**, *9*, e1003194.
- 381 [7] Tamerius, J.; Viboud, C.; Shaman, J.; Chowell, G. *PLOS Comput Biol* **2015**, *11*, e1004337.
- 382 [8] Deyle, E. R.; Maher, M. C.; Hernandez, R. D.; Basu, S.; Sugihara, G. *Proceedings of the*  
383 *National Academy of Sciences* **2016**, *113*, 13081–13086.

- 384 [9] Ewing, A.; Lee, E. C.; Viboud, C.; Bansal, S. *The Journal of infectious diseases* **2017**,  
385 *215*, 732–739.
- 386 [10] Luca, G. D.; Kerckhove, K. V.; Coletti, P.; Poletto, C.; Bossuyt, N.; Hens, N.; Colizza, V.  
387 *BMC Infectious Diseases* **2018**, *18*, 29.
- 388 [11] Balcan, D.; Hu, H.; Goncalves, B.; Bajardi, P.; Poletto, C.; Ramasco, J. J.; Paolotti, D.;  
389 Perra, N.; Tizzoni, M.; Broeck, V. d. W.; Colizza, V.; Vespignani, A. *BMC Medicine* **2009**,  
390 *7*, 45.
- 391 [12] Lemey, P.; Rambaut, A.; Bedford, T.; Faria, N.; Bielejec, F.; Baele, G.; Russell, C. A.;  
392 Smith, D. J.; Pybus, O. G.; Brockmann, D.; Suchard, M. A. *PLoS Pathog* **2014**, *10*,  
393 e1003932.
- 394 [13] Tizzoni, M.; Bajardi, P.; Poletto, C.; Ramasco, J. J.; Balcan, D.; Gonçalves, B.; Perra, N.;  
395 Colizza, V.; Vespignani, A. *BMC medicine* **2012**, *10*, 1–31.
- 396 [14] Russell, C. A. et al. *Science (New York, N.Y.)* **2008**, *320*, 340–346.
- 397 [15] Rambaut, A.; Pybus, O. G.; Nelson, M. I.; Viboud, C.; Taubenberger, J. K.; Holmes, E. C.  
398 *Nature* **2008**, *453*, 615–619.
- 399 [16] Bedford, T. et al. *Nature* **2015**, *523*, 217–220.
- 400 [17] Bonacina, F.; Boëlle, P.-Y.; Colizza, V.; Lopez, O.; Thomas, M.; Poletto, C. *International*  
401 *Journal of Infectious Diseases* **2023**, *128*, 132–139.
- 402 [18] Dhanasekaran, V.; Sullivan, S.; Edwards, K. M.; Xie, R.; Khvorov, A.; Valkenburg, S. A.;  
403 Cowling, B. J.; Barr, I. G. *Nature Communications* **2022**, *13*, 1721, Number: 1 Publisher:  
404 Nature Publishing Group.
- 405 [19] Davis, W. W.; Mott, J. A.; Olsen, S. J. *Influenza and Other Respiratory Viruses* **2022**,  
406 *16*, 568–576.
- 407 [20] Barrat, A.; Barthélemy, M.; Pastor-Satorras, R.; Vespignani, A. *Proceedings of the National*  
408 *Academy of Sciences of the United States of America* **2004**, *101*, 3747–3752.
- 409 [21] Colizza, V.; Barrat, A.; Barthelemy, M.; Valleron, A.-J.; Vespignani, A. *PLOS Med* **2007**,  
410 *4*, e13.

- 411 [22] Faucher, B.; Sabbatini, C. E.; Czuppon, P.; Kraemer, M. U. G.; Lemey, P.; Colizza, V.;  
412 Blanquart, F.; Boëlle, P.-Y.; Poletto, C. *medRxiv* **2024**,
- 413 [23] Lemey, P.; Hong, S. L.; Hill, V.; Baele, G.; Poletto, C.; Colizza, V.; Áine O’Toole;; Mc-  
414 Crone, J. T.; Andersen, K. G.; Worobey, M.; Nelson, M. I.; Rambaut, A.; Suchard, M. A.  
415 *Nature Communications* **2020**, *11*, 5110.
- 416 [24] Lemey, P. et al. *Nature* **2021**, *595*, 713–717.
- 417 [25] Hodcroft, E. B. et al. *Nature* **2021**, *595*, 707–712.
- 418 [26] Dudas, G. et al. *Nature communications* **2021**, *12*, 5769.
- 419 [27] Tsui, J. L.-H.; McCrone, J. T.; Lambert, B.; Bajaj, S.; Inward, R. P.; Bosetti, P.;  
420 Pena, R. E.; Tegally, H.; Hill, V.; Zarebski, A. E., et al. *Science* **2023**, *381*, 336–343.
- 421 [28] Balcan, D.; Colizza, V.; Gonçalves, B.; Hu, H.; Ramasco, J. J.; Vespignani, A. *Proceedings*  
422 *of the national academy of sciences* **2009**, *106*, 21484–21489.
- 423 [29] Gomes, M. F.; y Piontti, A. P.; Rossi, L.; Chao, D.; Longini, I.; Halloran, M. E.; Vespig-  
424 nani, A. *PLoS currents* **2014**, *6*.
- 425 [30] Poletto, C.; Gomes, M.; Pastore y Piontti, A.; Rossi, L.; Bioglio, L.; Chao, D.; Longini, I.;  
426 Halloran, M.; Colizza, V.; Vespignani, A. *Eurosurveillance* **2014**, *19*, 20936.
- 427 [31] Poletto, C.; Pelat, C.; Lévy-Bruhl, D.; Yazdanpanah, Y.; Boëlle, P.; Colizza, V. *Euro-*  
428 *surveillance* **2014**, *19*, 20824.
- 429 [32] Poletto, C.; Colizza, V.; Boëlle, P.-Y. *Epidemics* **2016**, *15*, 1–9.
- 430 [33] Zhang, Q.; Sun, K.; Chinazzi, M.; Piontti, A. P. y.; Dean, N. E.; Rojas, D. P.; Merler, S.;  
431 Mistry, D.; Poletti, P.; Rossi, L.; Bray, M.; Halloran, M. E.; Longini, I. M.; Vespignani, A.  
432 *Proceedings of the National Academy of Sciences* **2017**, *114*, E4334–E4343.
- 433 [34] Chinazzi, M. et al. *Science* **2020**, Publisher: American Association for the Advancement  
434 of Science Section: Research Article.
- 435 [35] Davis, J. T. et al. *Nature* **2021**, *600*, 127–132, Number: 7887 Publisher: Nature Publishing  
436 Group.

- 437 [36] Pullano, G.; Pinotti, F.; Valdano, E.; Boëlle, P.-Y.; Poletto, C.; Colizza, V. *Eurosurveillance*  
438 **2020**, *25*, 2000057.
- 439 [37] Gilbert, M.; Pullano, G.; Pinotti, F.; Valdano, E.; Poletto, C.; Boëlle, P.-Y.; d’Ortenzio, E.;  
440 Yazdanpanah, Y.; Eholie, S. P.; Altmann, M., et al. *The Lancet* **2020**, *395*, 871–877.
- 441 [38] A. Rvachev, L.; Longini, I. M. *Mathematical Biosciences* **1985**, *75*, 3–22.
- 442 [39] Grais, R. F.; Ellis, J. H.; Glass, G. E. *European Journal of Epidemiology* **2003**, *18*, 1065–  
443 1072.
- 444 [40] Hufnagel, L.; Brockmann, D.; Geisel, T. *Proceedings of the National Academy of Sciences*  
445 *of the United States of America* **2004**, *101*, 15124–15129.
- 446 [41] Balcan, D.; Vespignani, A. *Nature Physics* **2011**, *7*, 581–586.
- 447 [42] Keeling, M. J.; Danon, L.; Vernon, M. C.; House, T. A. *Proceedings of the National Academy*  
448 *of Sciences* **2010**, *107*, 8866–8870.
- 449 [43] Longini, I. M.; Halloran, M. E.; Nizam, A.; Yang, Y. *American Journal of Epidemiology*  
450 **2004**, *159*, 623–633.
- 451 [44] Cooper, B. S.; Pitman, R. J.; Edmunds, W. J.; Gay, N. J. *PLOS Med* **2006**, *3*, e212.
- 452 [45] Bielejec, F.; Lemey, P.; Baele, G.; Rambaut, A.; Suchard, M. A. *Syst. Biol.* **2014**, *63*,  
453 493–504.
- 454 [46] Suchard, M. A.; Lemey, P.; Baele, G.; Ayres, D. L.; Drummond, A. J.; Rambaut, A. *Virus*  
455 *Evolution* **2018**, *4*, vey016.
- 456 [47] He, D.; Lui, R.; Wang, L.; Tse, C. K.; Yang, L.; Stone, L. *Scientific Reports* **2015**, *5*,  
457 11013.
- 458 [48] Yang, W.; Lau, E. H. Y.; Cowling, B. J. *PLOS Computational Biology* **2020**, *16*, e1007989,  
459 Publisher: Public Library of Science.
- 460 [49] Yuan, H.; Kramer, S. C.; Lau, E. H. Y.; Cowling, B. J.; Yang, W. *PLOS Computational*  
461 *Biology* **2021**, *17*, e1009050, Publisher: Public Library of Science.

- 462 [50] Dorigatti, I.; Cauchemez, S.; Ferguson, N. M. *Proceedings of the National Academy of*  
463 *Sciences* **2013**, *110*, 13422–13427, Publisher: Proceedings of the National Academy of  
464 Sciences.
- 465 [51] Viboud, C.; Nelson, M. I.; Tan, Y.; Holmes, E. C. *Philosophical Transactions of the Royal*  
466 *Society B: Biological Sciences* **2013**, *368*, 20120199.
- 467 [52] Nelson, M. I.; Simonsen, L.; Viboud, C.; Miller, M. A.; Holmes, E. C. *PLOS Pathogens*  
468 **2007**, *3*, e131.
- 469 [53] Nelson, M. I.; Simonsen, L.; Viboud, C.; Miller, M. A.; Taylor, J.; George, K. S.; Griese-  
470 mer, S. B.; Ghedin, E.; Sengamalay, N. A.; Spiro, D. J.; Volkov, I.; Grenfell, B. T.; Lip-  
471 man, D. J.; Taubenberger, J. K.; Holmes, E. C. *PLOS Pathogens* **2006**, *2*, e125.
- 472 [54] Ghedin, E. et al. *Journal of Virology* **2010**, *84*, 5715–5718.
- 473 [55] Ross, Z. P.; Komadina, N.; Deng, Y.-M.; Spirason, N.; Kelly, H. A.; Sullivan, S. G.;  
474 Barr, I. G.; Holmes, E. C. *PLOS Pathogens* **2015**, *11*, e1004991.
- 475 [56] Kelly, H. A.; Grant, K. A.; Tay, E. L.; Franklin, L.; Hurt, A. C. *Influenza and Other*  
476 *Respiratory Viruses* **2013**, *7*, 1136–1141.
- 477 [57] Alonso, W. J.; Yu, C.; Viboud, C.; Richard, S. A.; Schuck-Paim, C.; Simonsen, L.;  
478 Mello, W. A.; Miller, M. A. *Scientific Reports* **2015**, *5*, 17214.
- 479 [58] Yu, H.; Alonso, W. J.; Feng, L.; Tan, Y.; Shu, Y.; Yang, W.; Viboud, C. *PLOS Medicine*  
480 **2013**, *10*, e1001552.
- 481 [59] Caini, S.; Alonso, W. J.; Séblain, C. E.-G.; Schellevis, F.; Paget, J. *Eurosurveillance* **2017**,  
482 *22*, 30606.
- 483 [60] Alonso, W. J.; Viboud, C.; Simonsen, L.; Hirano, E. W.; Daufenbach, L. Z.; Miller, M. A.  
484 *American Journal of Epidemiology* **2007**, *165*, 1434–1442.
- 485 [61] Apolloni, A.; Poletto, C.; Colizza, V. *BMC Infectious Diseases* **2013**, *13*, 176.
- 486 [62] Chen, Z.; Tsui, J. L.-H.; Gutierrez, B.; Moreno, S. B.; du Plessis, L.; Deng, X.; Cai, J.;  
487 Bajaj, S.; Suchard, M. A.; Pybus, O. G.; Lemey, P.; Kraemer, M. U. G.; Yu, H. *medRxiv*  
488 **2023**,

- 489 [63] Caini, S.; Meijer, A.; Nunes, M. C.; Henaff, L.; Zounon, M.; Boudewijns, B.; Ric-  
490 cio, M. D.; Paget, J. Is influenza B/Yamagata extinct and what public health implica-  
491 tions could this have? An updated literature review and comprehensive assessment of  
492 global surveillance databases. 2023; [https://www.medrxiv.org/content/10.1101/2023.](https://www.medrxiv.org/content/10.1101/2023.09.25.23296068v1)  
493 [09.25.23296068v1](https://www.medrxiv.org/content/10.1101/2023.09.25.23296068v1), Pages: 2023.09.25.23296068.
- 494 [64] International Air Transport Association (IATA). 2013; <http://www.iata.org>.
- 495 [65] Halloran, M. E.; Jr, I. M. L.; Struchiner, C. J. *Design and Analysis of Vaccine Studies*;  
496 Statistics for Biology and Health; Springer New York, 2010; pp 63–84, DOI: 10.1007/978-  
497 0-387-68636-3\_4.
- 498 [66] Sattenspiel, L.; Dietz, K. *Mathematical Biosciences* **1995**, *128*, 71–91.
- 499 [67] Keeling, M. J.; Rohani, P. *Ecology Letters* **2002**, *5*, 20–29.
- 500 [68] Poletto, C.; Tizzoni, M.; Colizza, V. *Scientific Reports* **2012**, *2*.
- 501 [69] Lemey, P.; Rambaut, A.; Drummond, A. J.; Suchard, M. A. *PLoS Comput. Biol.* **2009**, *5*,  
502 e1000520.
- 503 [70] Nelson, M. I.; Viboud, C.; Vincent, A. L.; Culhane, M. R.; Detmer, S. E.; Wentworth, D. E.;  
504 Rambaut, A.; Suchard, M. A.; Holmes, E. C.; Lemey, P. *Nat Commun* **2015**, *6*, 6696.
- 505 [71] Faria, N. R.; Suchard, M. A.; Rambaut, A.; Streicker, D. G.; Lemey, P. *Philos. Trans. R.*  
506 *Soc. Lond., B, Biol. Sci.* **2013**, *368*, 20120196.
